# Supplementary material
Source: PubMed Central journal article supplement (PMC3155179)
Supplement: mmc1.pdf [file mmc1.pdf]

The American Journal of Human Genetics, Volume 89

Supplemental Data

**Mutations in *CDON*, Encoding a Hedgehog Receptor,  
Result in Holoprosencephaly and Defective  
Interactions with Other Hedgehog Receptors**

Gyu-un Bae, Sabina Domené, Erich Roessler, Karen Schachter, Jong-Sun Kang, Maximilian Muenke, and Robert S. Krauss

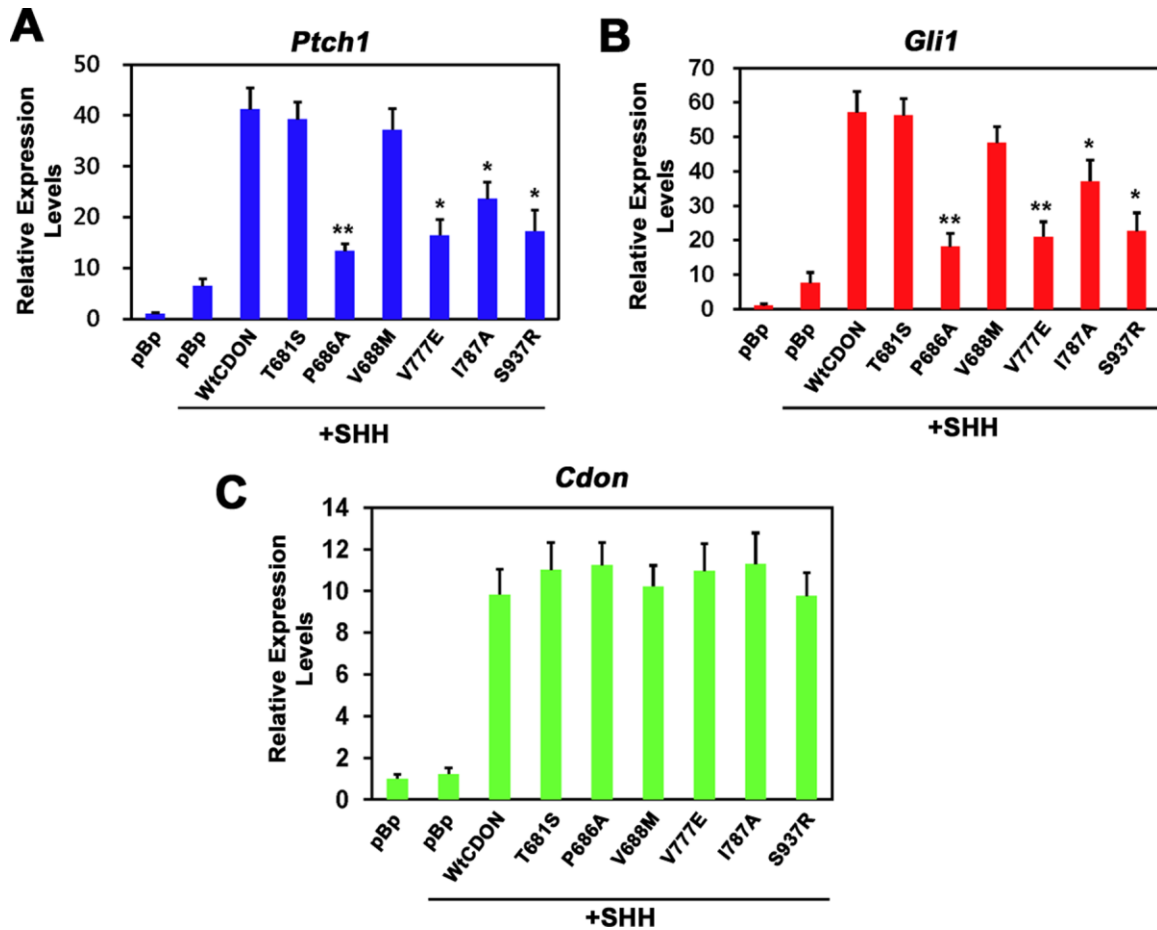

**Figure S1. CDON Variants Do Not Support SHH-Dependent Gene Expression**

(A-C) qRT-PCR analysis of *Ptch1* (A), *Gli1* (B) and *Cdo* (C) expression in 10T1/2 cells transfected with 2  $\mu$ g of the indicated CDON vectors, plus or minus treatment with SHH. Expression was normalized to *Gapdh*. Error bars represent the means of triplicate determinations  $\pm$  SD. \*\*,  $p < 0.01$ , \*,  $p < 0.05$  as compared to wild-type CDON. CDON variants are designated as in Figure 1.

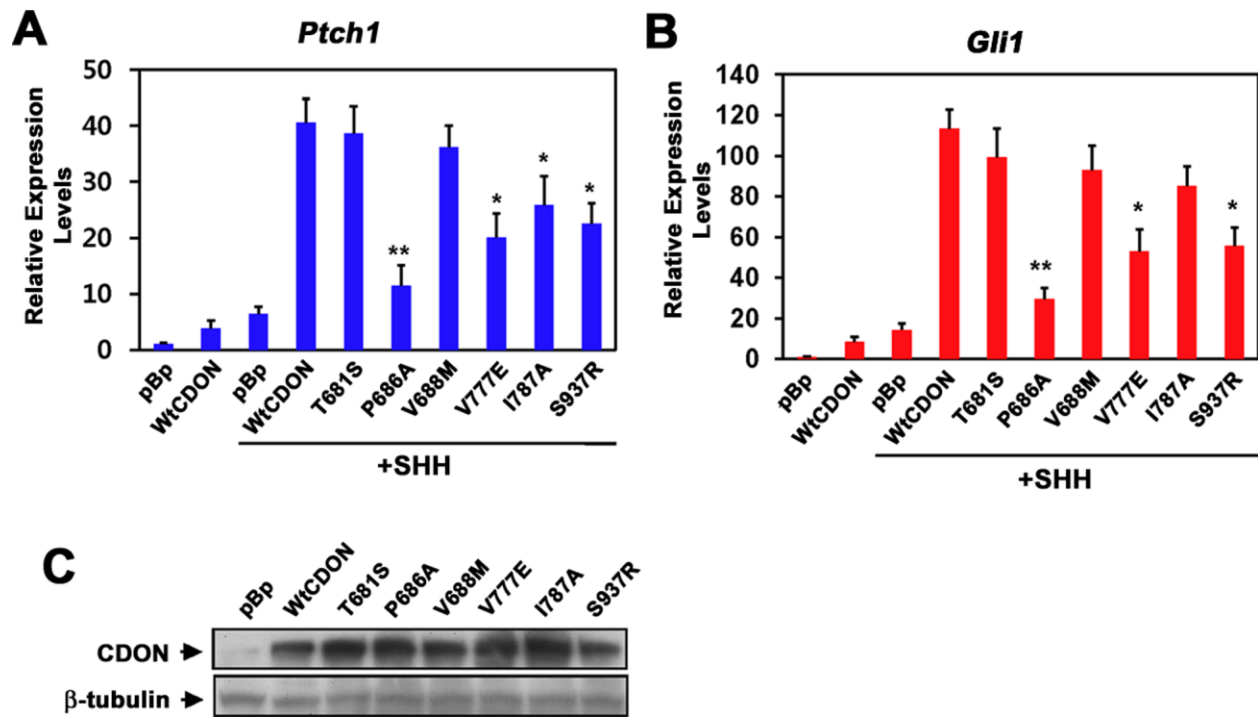

**Figure S2. Overexpression Reveals Partial Loss of Function in Some CDON Variants**

(A, B) qRT-PCR analysis of *Ptch1* (A) and *Gli1* (B) expression in 10T1/2 cells transfected with 5  $\mu$ g of the indicated CDON vectors, plus or minus treatment with SHH. Expression was normalized to *Gapdh*. Error bars represent the means of triplicate determinations  $\pm$  SD. \*\*,  $p < 0.01$ , \*,  $p < 0.05$  as compared to wild-type CDON.

(C) Western blot analysis of CDON expression in 10T1/2 cells under the conditions used in (A, B). CDON variants are designated as in Figure 1.

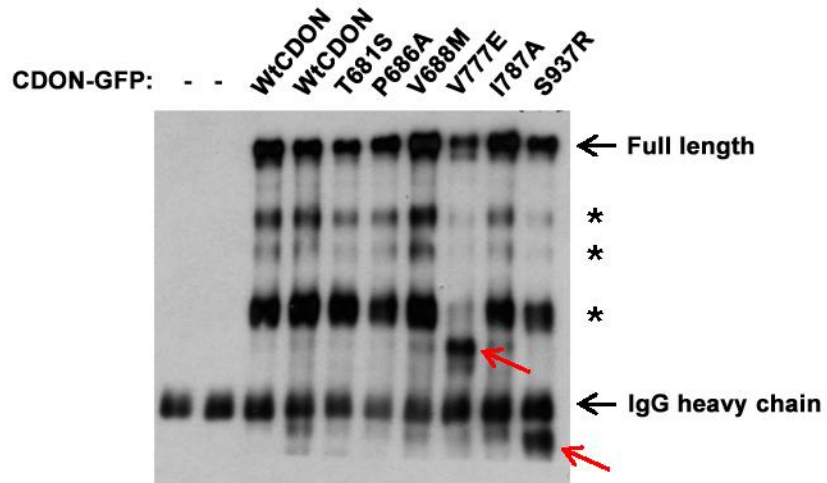

**Figure S3. CDO p.Val777Glu (V777E) and p.Ser937Arg (S937R) Display Different or Additional Products Than Wt CDON upon Limited Proteolysis**

Wt CDON and HPE-associated variants with a C-terminal GFP tag were expressed in 293T cells and immunoprecipitated with anti-CDON antibodies. Immunoprecipitates were incubated at 4° C prior to Western blot analysis with anti-GFP antibodies. Proteolytic degradation products are indicated by asterisks; the red arrows indicate the presence of a different (V777E) or additional (S937R) proteolytic product not seen with Wt CDON or the other variants. Note that V777E and S937R also display reduced half-lives (Table 1). CDON variants are designated as in Figure 1.

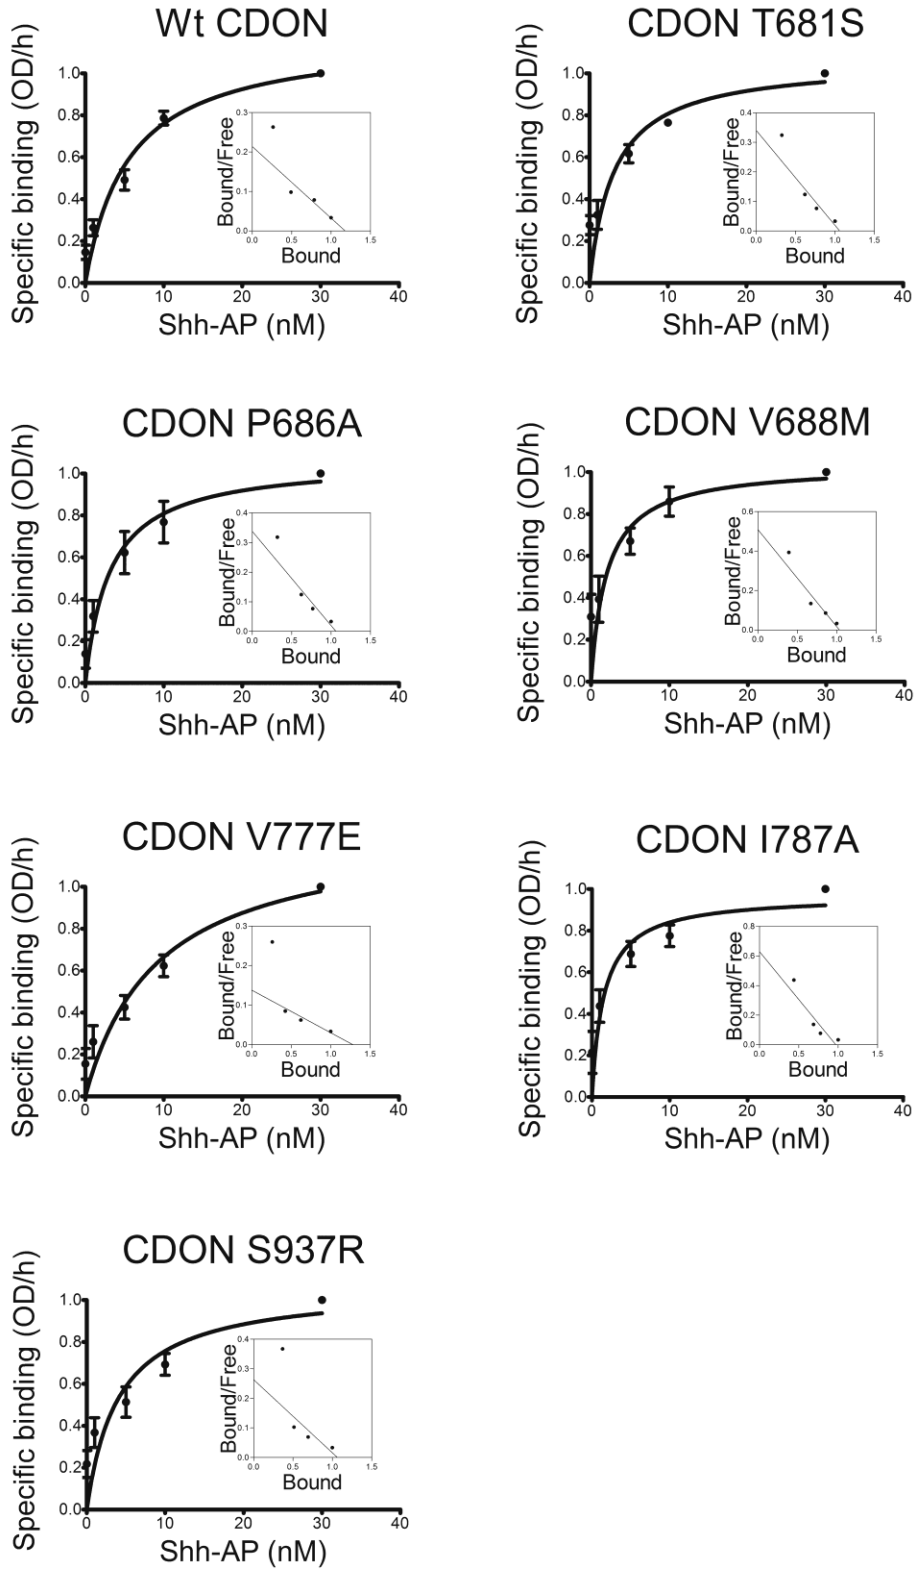

**Figure S4. Measurement of Dissociation Constants for SHH-N::AP Binding to CDON Variants**

Saturation binding curves and Scatchard analysis plots (inset) for CDON and the indicated variants. Points on the curves represent means of triplicate determinations  $\pm$  SD. CDON variants are designated as in Figure 1.

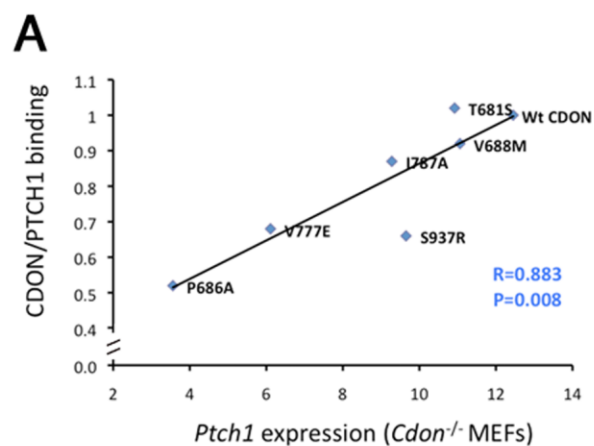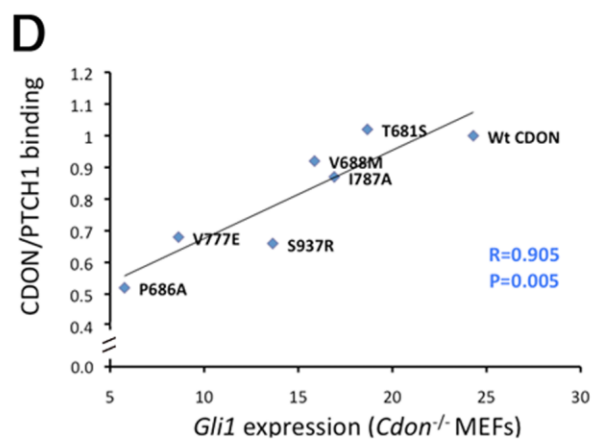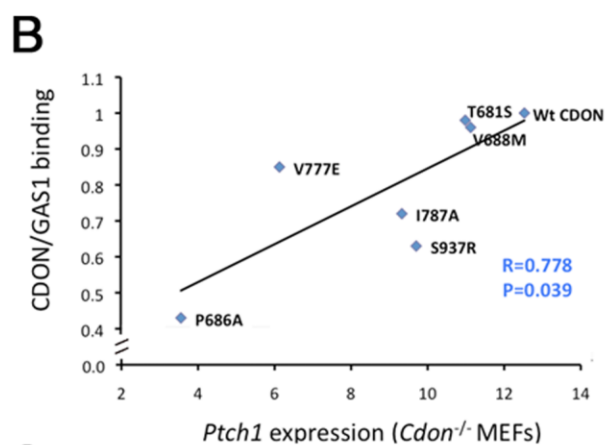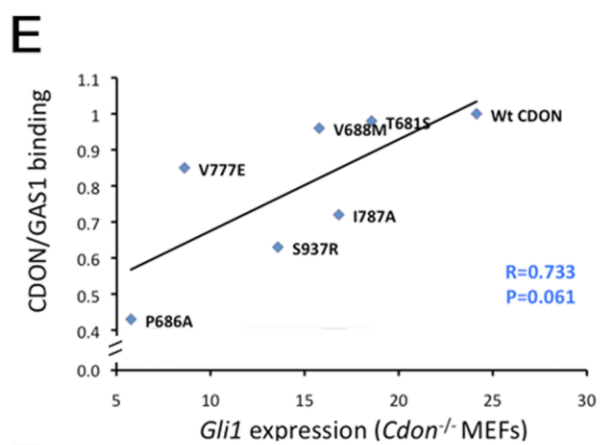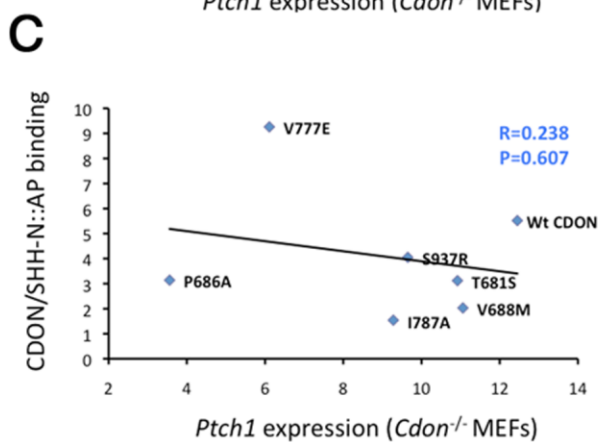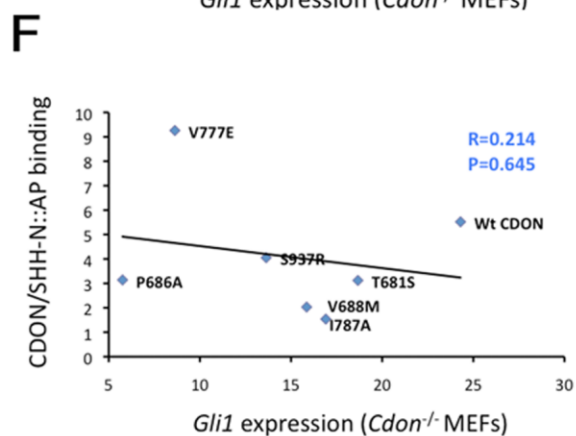

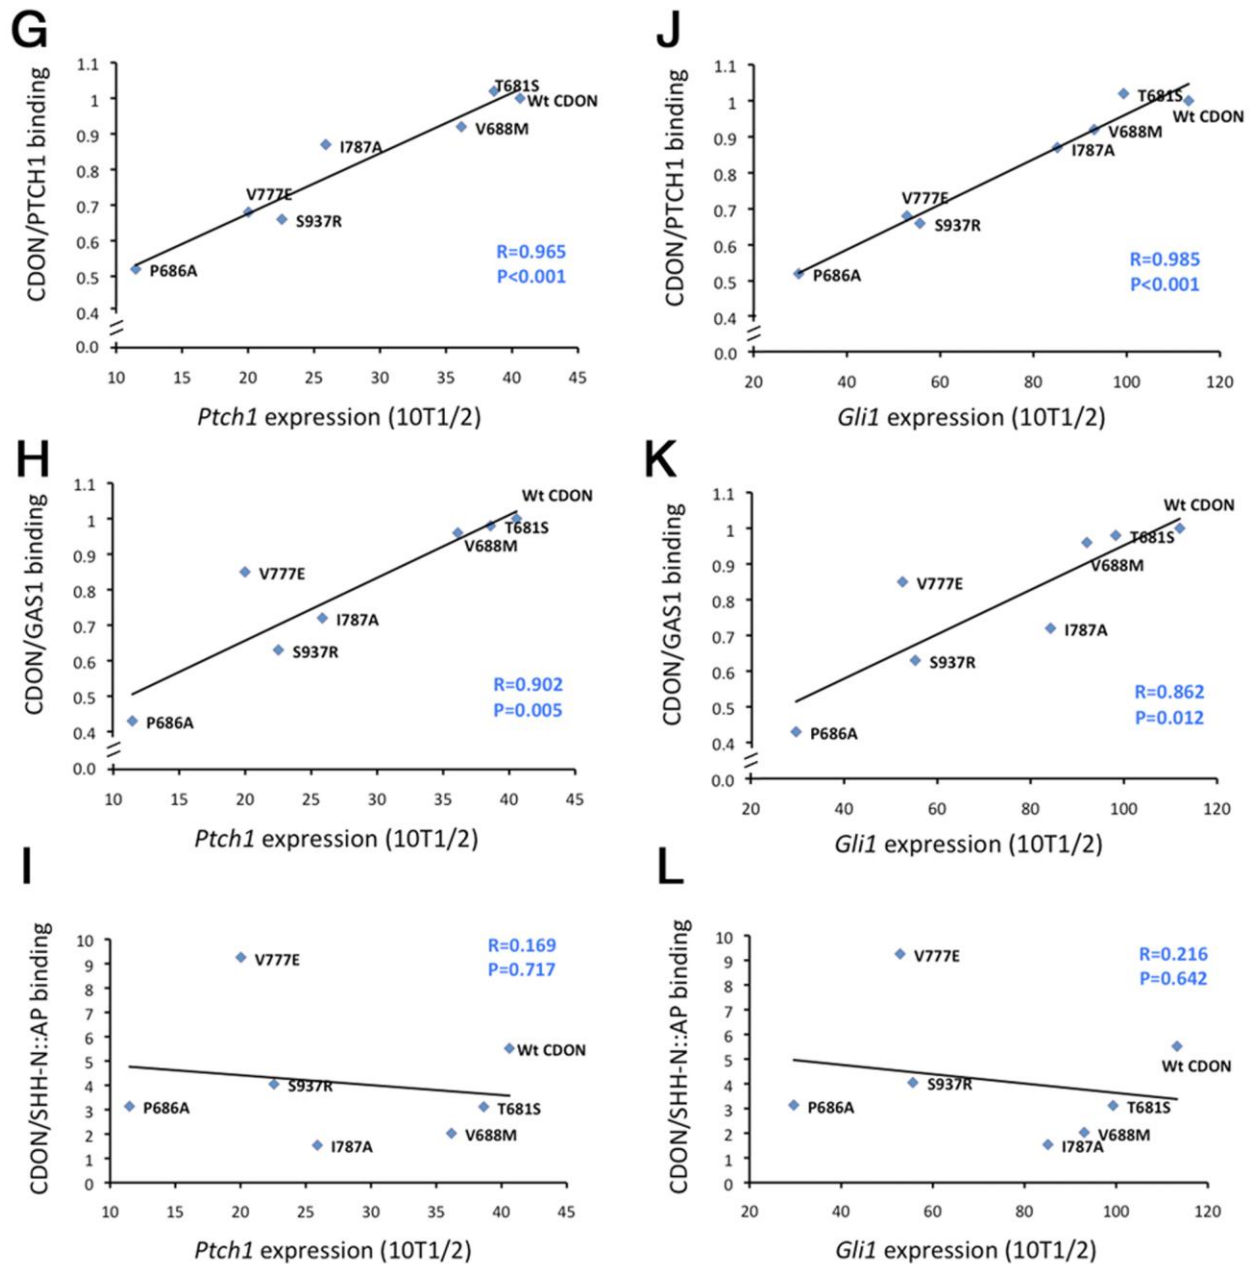

**Figure S5. Correlations between CDON Variant Activity in Cell-Based Assays and Binding to PTCH1, GAS1, and SHH**

*Gli1* and *Ptch1* expression in *Cdon*<sup>-/-</sup> MEFs and in 10T1/2 cells (Figure S2A-D) were plotted against quantification of CDON/PTCH1 binding, CDON/GAS1 binding and CDON/SHH-N::AP binding (Figure 2B, Figure 2G and Table 2, respectively). Correlation coefficients (R) are shown for each; P values were determined with Student's t-test.

- (A) CDON/PTCH1 binding vs. *Ptch1* expression in *Cdon*<sup>-/-</sup> MEFs.
- (B) CDON/GAS1 binding vs. *Ptch1* expression in *Cdon*<sup>-/-</sup> MEFs.
- (C) CDON/SHH-N::AP binding vs. *Ptch1* expression *Cdon*<sup>-/-</sup> MEFs.
- (D) CDON/PTCH1 binding vs. *Gli1* expression in *Cdon*<sup>-/-</sup> MEFs.



- (E) CDON/GAS1 binding vs. *Gli1* expression in *Cdon*<sup>-/-</sup> MEFs.
  - (F) CDON/SHH-N::AP binding vs. *Gli1* expression in *Cdon*<sup>-/-</sup> MEFs.
  - (G) CDON/PTCH1 binding vs. *Ptch1* expression in 10T1/2 cells.
  - (H) CDON/GAS1 binding vs. *Ptch1* expression in 10T1/2 cells.
  - (I) CDON/SHH-N::AP binding vs. *Ptch1* expression in 10T1/2 cells.
  - (J) CDON/PTCH1 binding vs. *Gli1* expression in 10T1/2 cells.
  - (K) CDON/GAS1 binding vs. *Gli1* expression in 10T1/2 cells.
  - (L) CDON/SHH-N::AP binding vs. *Gli1* expression in 10T1/2 cells.
- CDON variants are designated as in Figure 1.

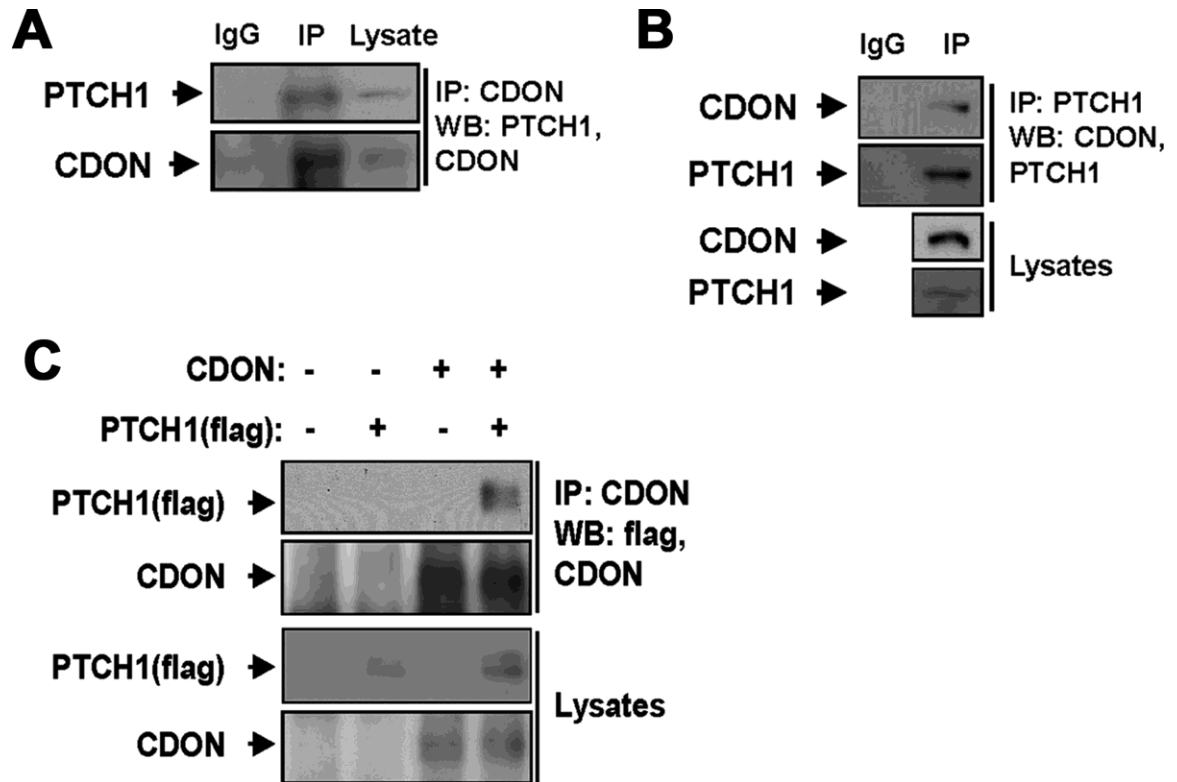

**Figure S6. CDON Interacts with PTCH1**

(A) RD cell lysates were immunoprecipitated with antibodies to CDON or control IgG and immunoblotted with antibodies to PTCH1 and CDON. Lysates were immunoblotted as a control. (B) RD cell lysates were immunoprecipitated with antibodies to PTCH1 or control IgG and immunoblotted with antibodies to CDON and PTCH1. Lysates were immunoblotted as a control. (C) 293T cells were transfected with expression vectors encoding CDON and/or flag-tagged PTCH1 (+) or control vectors (-) as indicated. Lysates were immunoprecipitated with antibodies to CDON and Western blotted with antibodies to flag epitope or CDON. Lysates were also blotted as a control. This experiment is a reciprocal co-immunoprecipitation to that shown in Figure 3A.

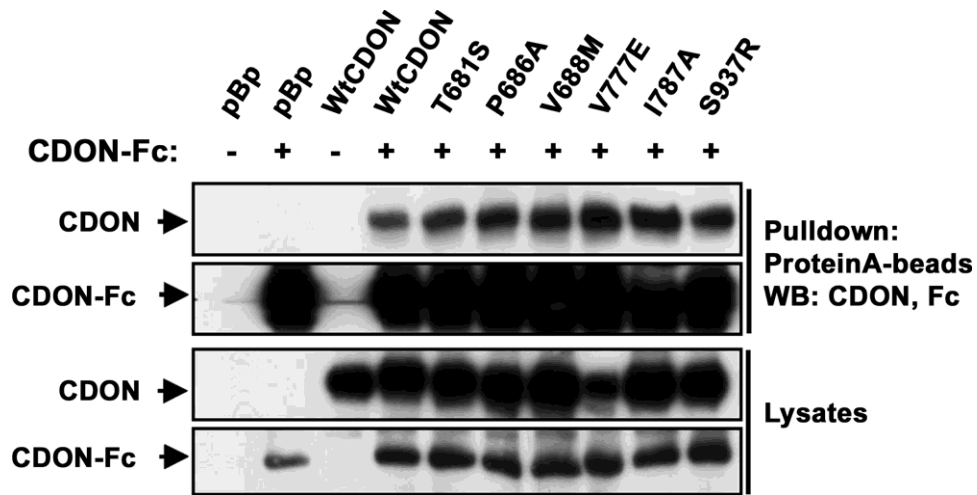

**Figure S7. CDON Variants Do Not Display Defects in Interaction with Wt CDO**  
 293T cells were transfected with plasmids encoding CDON ectodomain-Fc fusion protein and CDON variants as indicated, lysates were pulled down with protein A-agarose and Western blotted with antibodies to Fc or CDON intracellular region (CDON). Lysates were probed as a control. CDON variants are designated as in Figure 1.

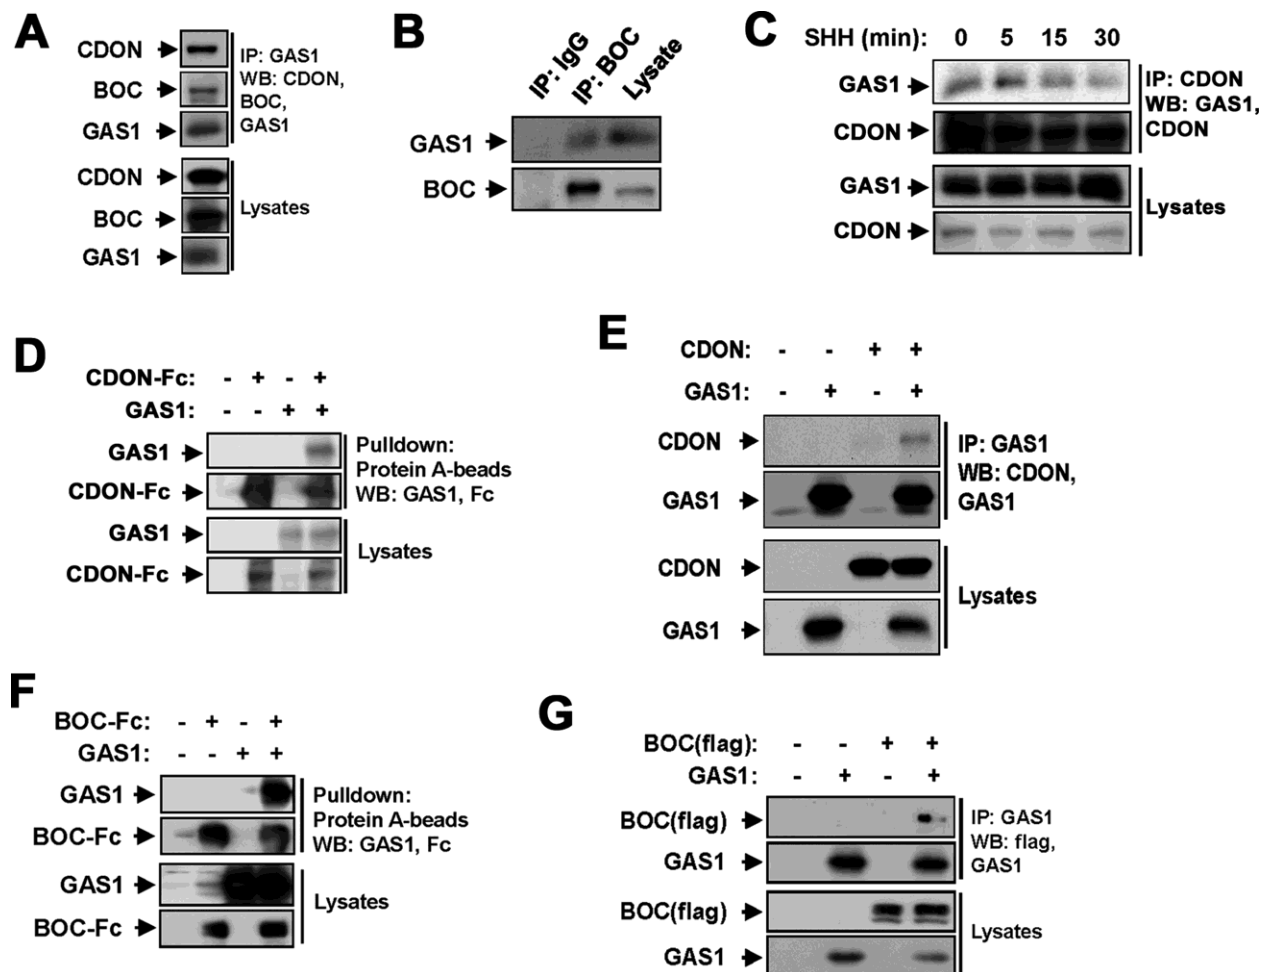

### Figure S8. CDON and BOC Interact with GAS1

(A) C2C12 cell lysates were immunoprecipitated with antibodies to GAS1 and immunoblotted with antibodies to CDON, BOC and GAS1. Lysates were immunoblotted as a control. This experiment is a reciprocal co-immunoprecipitation to that shown in Figure 3E.

(B) 10T1/2 cell lysates were immunoprecipitated with antibodies to BOC or with control IgG and immunoblotted with antibodies to BOC and GAS1. Lysates were probed as a control.

(C) 10T1/2 cells were treated with recombinant SHH for the indicated times and cell lysates were immunoprecipitated with antibodies to CDON then Western blotted with antibodies to CDON and GAS1. Lysates were immunoblotted as a control.

(D) 293T cells were transfected with expression vectors encoding CDON ectodomain-Fc fusion protein and GAS1 as indicated, lysates were pulled down with protein A-agarose and Western blotted with antibodies to GAS1 or Fc as indicated. Lysates were probed as a control.

(E) 293T cells were transfected with expression vectors encoding GAS1 and/or CDON (+) or control vectors (-) as indicated. Lysates were immunoprecipitated with antibodies to GAS1 and Western blotted with antibodies to CDON or GAS1. Lysates were also blotted as a control.

(F) 293T cells were transfected with expression vectors encoding BOC ectodomain-Fc fusion protein and GAS1 as indicated, lysates were pulled down with protein A-agarose and Western blotted with antibodies to GAS1 or Fc as indicated. Lysates were probed as a control.

(G) 293T cells were transfected with expression vectors encoding GAS1 and/or flag-tagged BOC (+) or control vectors (-) as indicated. Lysates were immunoprecipitated with antibodies to GAS1 and Western blotted with antibodies to flag epitope or GAS1. Lysates were also blotted as a control.

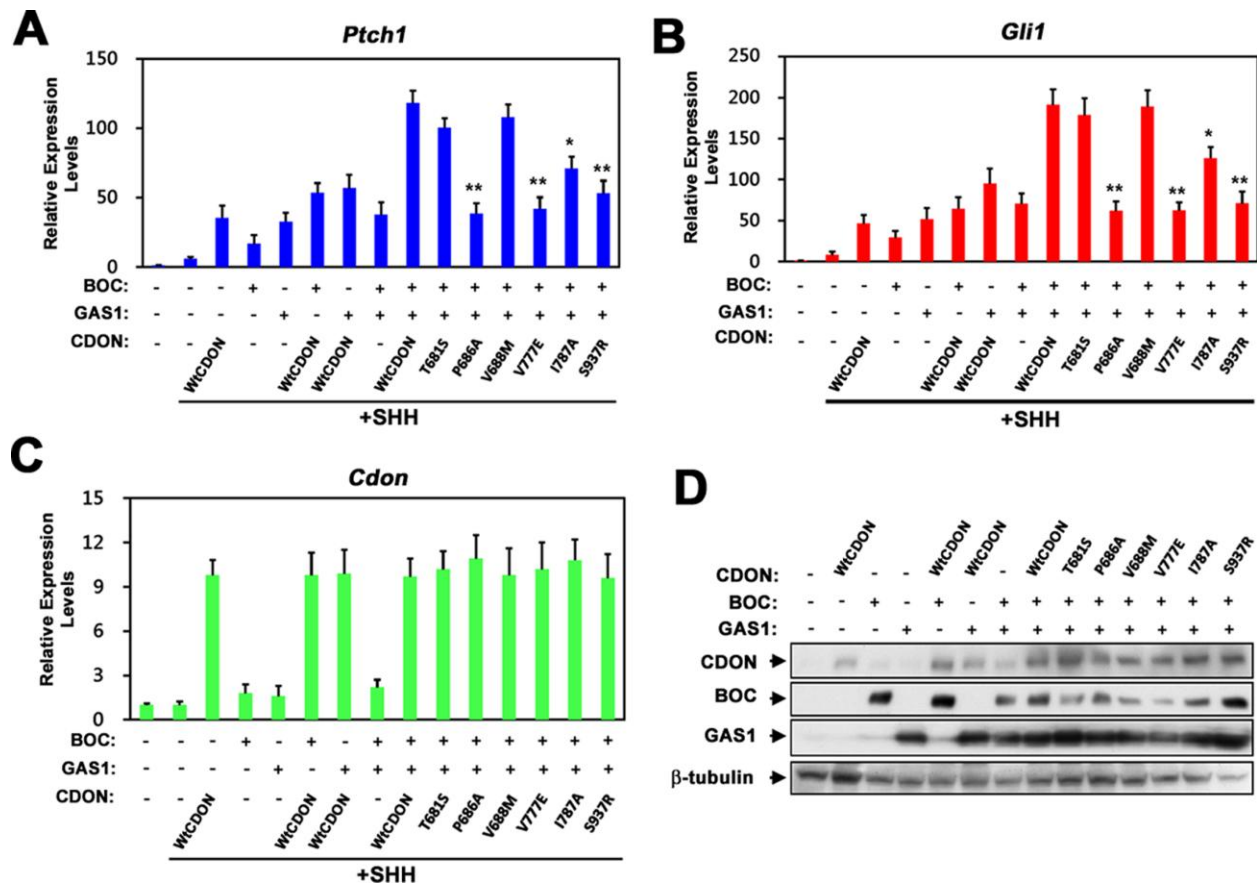

**Figure S9. CDON, BOC and GAS1 Have Roughly Additive Activity in Promoting SHH-Dependent Gene Expression**

(A, B) qRT-PCR analysis of *Gli1* and *Ptch1* expression in 10T1/2 cells transfected with 2  $\mu$ g of the indicated CDON, BOC and GAS1 expression vectors, plus or minus treatment with SHH. Expression was normalized to *Gapdh*. Error bars represent the means of triplicate determinations  $\pm$  SD. \*\*,  $p < 0.01$ , \*,  $p < 0.05$  as compared to cells transfected with Wt CDON, BOC and GAS1.

(C) qRT-PCR analysis of expression of CDON mutants in *Cdon*<sup>-/-</sup> MEFs from same RNA samples analyzed in (A, B).

(D) Western blot analysis of CDON, BOC and GAS1 expression in 10T1/2 cells transfected with 5  $\mu$ g of CDON, BOC and GAS1 expression vectors.

**Table S1. Genetic Variation of the *CDON* Coding Region**

| Variation       | Amino acid  | dbSNP      | Hetero dbSNP <sup>a</sup> | MAF <sup>b</sup> subjects<br>(n =282) | MAF controls<br>(n = 96) | MAF<br>(n = 44) |
|-----------------|-------------|------------|---------------------------|---------------------------------------|--------------------------|-----------------|
| c.76+21G>A      | N/A         | rs1939890  | 0.236                     | 0.00175                               | -                        | -               |
| c.197A>G        | p.Lys66Arg  | rs7122277  | 0.065                     | 0.0175                                | 0.0104                   | 0.18            |
| c.223G>A        | p.Val75Ile  | rs3740912  | 0.49                      | 0.657                                 | 0.646                    | 0.81            |
| c.330T>C        | p.Pro110Pro | rs35131477 | 0.053                     | 0.0684                                | -                        | 0.14            |
| c.349+39_40insT | N/A         |            | -                         | 0.189                                 | N.D.                     | -               |
| c.350-11A>G     | N/A         |            | -                         | 0.00175                               | -                        | -               |
| c.484G>A        | p.Glu162Lys | rs3740909  | 0.197                     | 0.0930                                | 0.0677                   | 0.28            |
| c.497-20G>A     | N/A         |            | -                         | 0.00175                               | -                        | -               |
| c.640+12G>A     | N/A         | rs4426144  | 0.202                     | 0.105                                 | 0.0677                   | -               |
| c.1144G>C       | p.Ala382Pro |            | -                         | -                                     | 0.0052                   | -               |
| c.1167G>A       | p.Met389Ile |            | -                         | -                                     | 0.0052                   | -               |
| c.1263T>C       | p.Phe421Phe |            | -                         | -                                     | 0.0052                   | -               |
| c.1296G>A       | p.Pro432Pro | rs11220313 | 0.044                     | -                                     | 0.0104                   | -               |
| c.1500C>T       | p.Cys500Cys |            | -                         | 0.00175                               | -                        | -               |
| c.1603G>A       | p.Ala535Thr | rs76247998 | 0.295                     | 0.00526                               | 0.0208                   | -               |
| c.1671G>A       | p.Lys557Lys | rs35884952 | 0.025                     | 0.0175                                | 0.0156                   | 0.06            |
| c.1818G>T       | p.Leu606Leu |            | -                         | 0.00175                               | 0.0052                   | -               |
| c.1842G>A       | p.Lys614Lys | rs35705696 | 0.025                     | -                                     | 0.0052                   | -               |
| c.1847G>A       | p.Arg616Gln |            | -                         | -                                     | 0.0052                   | -               |
| c.1851+14G>A    | N/A         |            | -                         | 0.0035                                | 0.0156                   | -               |
| c.2037A>G       | p.Ala679Ala | rs516664   | 0.416                     | 0.498                                 | 0.515                    | 0.48            |
| c.2051C>G       | p.Thr684Ser |            | -                         | 0.00175                               | -                        | 0.06            |
| c.2057C>T       | p.Ala686Val | rs12274923 | 0.101                     | 0.377                                 | 0.505                    | 0.44            |
| c.2065C>G       | p.Pro689Ala |            | -                         | 0.00175                               | -                        | -               |
| c.2071G>A       | p.Val691Met |            | -                         | 0.00175                               | -                        | -               |
| c.2362+48T>G    | N/A         |            | -                         | -                                     | 0.0052                   | -               |
| c.2339T>A       | p.Val780Glu |            | -                         | 0.00175                               | -                        | -               |

**Table S1. Genetic variation of the *CDON* coding region (continued)**

|                     |                    |             |       |                |        |
|---------------------|--------------------|-------------|-------|----------------|--------|
| c.2392A>G           | p.Ile798Val        | -           | -     | 0.0052         | -      |
| <b>c.2368A&gt;G</b> | <b>p.Thr790Ala</b> | -           | -     | <b>0.00175</b> | -      |
| c.2623A>G           | p.Ser875Gly        | rs115533243 | N.D.  | -              | 0.0052 |
| <b>c.2818A&gt;C</b> | <b>p.Ser940Arg</b> | -           | -     | <b>0.00175</b> | -      |
| c.2859G>T           | p.Gly953Gly        | -           | -     | 0.00175        | -      |
| c.3039C>T           | p.Asn1013Asn       | rs684805    | 0.369 | 0.166          | 0.187  |
| c.3156G>A           | p.Lys1052Lys       | -           | -     | 0.00175        | -      |
| c.3165T>C           | p.Asn1055Asn       | rs564214    | 0.366 | 0.166          | 0.187  |
| c.3294G>A           | p.Thr1098Thr       | rs3740904   | 0.50  | 0.072          | 0.265  |
| c.3297C>A           | p.Ala1099Ala       | -           | -     | 0.00175        | -      |
| c.3393C>T           | p.Ser1131Ser       | -           | -     | 0.00175        | -      |
| c.3526G>A           | p.Val1176Ile       | rs78304400  | 0.180 | 0.008          | 0.010  |
| c.3549C>T           | p.Val1183Val       | rs2276061   | 0.397 | 0.063          | 0.469  |
| c.3559C>T           | p.Arg1187Cys       | -           | -     | 0.00175        | 0.010  |
| c.3588C>T           | p.Asp1196Asp       | -           | -     | 0.00175        | 0.0208 |
| c.3662T>A           | p.Ile1221Asn       | rs684535    | 0.274 | 0.372          | 0.802  |
| c.3794*15C>T        | N/A                | -           | -     | 0.0052         | 0.0052 |

<sup>a</sup> Heterozygosity measurements of human *CDON* (NM\_016952.4) variations based on up to 51 different populations from dbSNP ([www.ncbi.nlm.nih.gov/SNP](http://www.ncbi.nlm.nih.gov/SNP)). <sup>b</sup> MAF = minor allele frequency based on dHPLC profiles or direct sequencing (Jehee *et al.*, 2006).



**Table S2. Primers and Amplification Conditions**

| <i>Exon</i> | <b>Size (pb)</b> | <b>T. annealing PCR (°C)</b> | <b>Primer Sequences 5'→3'</b>                                    | <b>Elution Temp (°C)</b> | <b>Buffer B (%)</b> |
|-------------|------------------|------------------------------|------------------------------------------------------------------|--------------------------|---------------------|
| 1           | 175              | 54                           | F: CTCTGGAAGCCTGTCCTGATTGCT<br>R: GTTTTATAGGATTAAGATGAGTAAAGG    | 58                       | 52                  |
| 2           | 401              | 50                           | F: CTTTTCTCCCCTGCTTTCTTTGC<br>R: GGTCTTTCCCCTCTTCAGAAATATAAG     | 54;59                    | 60;58               |
| 3           | 236              | 54                           | F: TGCATGTATTTATTTATCTGTTTC<br>R: TAATGAGCATTGTTCTGTGTGTG        | 55;59                    | 55;52               |
| 4           | 249              | 58                           | F: AGTTGTGCTGTGGTGTCTTCATAAAG<br>R: GGACTCTTCCTCTTCCAGTTACCATT   | 56                       | 55                  |
| 5           | 398              | 54                           | F: ATCGAAGACTTACTAATAATCTCTC<br>R: CCTTCAGGTATCAGTTAGACCAGA      | 53.5;59                  | 60;58               |
| 6           | 395              | 54                           | F: GAAGTACATTTTGAGGGCTAGAGTTT<br>R: TAATTTCAATTTTGACCACAACAA     | 54.5;59                  | 59;57               |
| 7           | 473              | 54                           | F: CATCGTAGGTAACAATGTTCTTC<br>R: CACTTTATCTTCTATTATAAAAGGA       | 50;60                    | 61;59               |
| 8           | 388              | 54                           | F: AATGAGGAGTATCTTCAAGCTGTCTCC<br>R: CGTTCAGGTGTGAGCCGAGAAAGATGA | 59;62                    | 58;57               |
| 9           | 268              | 58                           | F: CCTCCATCTCCTGCTTTTCTTTCTG<br>R: GACATCAGGGCAGCCAGCTCATTCC     | 61                       | 57                  |
| 10          | 256              | 54                           | F: GACTCTTTTTTCCACTTTACATACA<br>R: TCTGAAGCAGGTCAGTTATATTTGT     | 53;58                    | 57;53               |
| 11          | 306              | 54                           | F: TTGTCTCTGACATGGTGGGTTATT<br>R: TATATGTATCTAAAGTTCACATCG       | 55;59                    | 60;57               |
| 12          | 361              | 58                           | F: GTCCTATTATAGCTTTTCTTAGTTATG<br>R: ACATGACCAAACCACAAAATCTCAT   | 55;59                    | 58;57               |
| 13          | 210              | 50                           | F: TAATTTTCTCTTTGACAAGTCTT<br>R: ATATTCATAAACCTTCTTTCTCCA        | 56;58                    | 55;54               |
| 14          | 232              | 58                           | F: CATTTAGGCTGTATGATGTGTA<br>R: TCAGAAGCAGTAATCCAGGGTTGG         | 58                       | 57                  |
| 15          | 314              | 58                           | F: TCTGTATTCACTCTGACATCATGTT<br>R: CTACCCACCTTTAGAAAAAGAGAAG     | 55;59                    | 59;56               |
| 16          | 361              | 58                           | F: TGTGTGCGTGTGTCTTTTTTGT<br>R: CCTGAGGGACAGAGGGGCTTTTAT         | 57;60                    | 60;57               |
| 17          | 186              | 58                           | F: TGTGAGTACCTTCAGCATTCTTC<br>R: ATATGCCTTATTCACAACAGCTTG        | 58;62                    | 54;47               |
| 18          | 446              | 58                           | F: GTCTGTGAATACAGAATACCAAATG<br>R: CCTTCCCATACACAGCTCTTAGCT      | 56;61                    | 60;59               |
| 19          | 265              | 58                           | F: AACTGCTTTGTAATAATCAGCCT<br>R: GCTTGAAGTTGGAACATGACTGGT        | 59.5;62                  | 58;54               |

**Table S3. Genetic Variation of the *SHH*, *ZIC2*, *SIX3* and *TGIF* Loci in Individuals with *CDON* Mutations**

| Patient number | <i>CDON</i> variation | Amino acid  | <i>SHH</i><br>NM_000193.2 | <i>ZIC2</i><br>NM_007129.2                 | <i>SIX3</i><br>NM_005413.2            | <i>TGIF</i><br>NM_003244.2                                                                          | Other <sup>a</sup> |
|----------------|-----------------------|-------------|---------------------------|--------------------------------------------|---------------------------------------|-----------------------------------------------------------------------------------------------------|--------------------|
| 5410           | c.2051C>G             | p.Thr684Ser | rs1233555<br>c.301-49G>A  | -                                          | -                                     | -                                                                                                   | none               |
| 7190           | c.2065C>G             | p.Pro689Ala | rs1233555<br>c.301-49G>A  | -                                          | rs78018362<br>c.90G>A<br>(p.Ala30Ala) | -                                                                                                   | none               |
| 5308           | c.2071G>A             | p.Val691Met | -                         | c.1377-<br>1406dup;<br>p.Ala461-<br>470dup | -                                     | -                                                                                                   | none               |
| 6864           | c.2339T>A             | p.Val780Glu | rs1233555<br>c.301-49G>A  | -                                          | -                                     | -                                                                                                   | none               |
| 5288           | c.2368A>G             | p.Thr790Ala | -                         | -                                          | -                                     | rs2229337<br>c.420A>G<br>(p.Pro140Pro);<br>common variant<br>c.488C>T<br>(p.Pro163Leu) <sup>b</sup> | none               |
| 7321           | c.2818A>C             | p.Ser940Arg | rs1233555<br>c.301-49G>A  | -                                          | -                                     | -                                                                                                   | none               |

<sup>a</sup> Research analysis of multiple candidate gene coding and non-coding elements (reviewed in Roessler and Muenke, 2010).

<sup>b</sup> unpublished CLIA laboratory observations.

**Table S4. Primers for Construction of Rat *Cdon* Site-Directed Mutants**

| Rat <i>CDON</i> mutant | Primer <sup>1</sup>                                        |
|------------------------|------------------------------------------------------------|
| p.Thr681Ser            | 5'-catcatcaaaaaaca <b>G</b> ccaAgcTtccttccacctgtg-3'       |
| p.Pro686Ala            | 5'-accaggcgtctctt <b>G</b> acctgtgggGatccctaagcggcct-3'    |
| p.Val688Met            | 5'-gcgtccttccacct <b>A</b> tgggGatccctaagcggcct-3'         |
| p.Val777Glu            | 5'-cttccaaactctct <b>G</b> aggaagtccgAagCtagagccaggttcg-3' |
| p.Ile787Ala            | 5'-gagtttagagccaggAtc <b>C</b> Gcatacaaatagg-3'            |
| p.Ser937Arg            | 5'-cccatgaaagagttg <b>C</b> gTacGcctcccagttctca-3'         |

<sup>1</sup>Capitalized letters are changes from wild-type rat sequence. Bold letters designate the altered codon in the mutant. Bold capitals produce the amino acid substitution, capitals not in bold are silent changes that create a new restriction site used for identification of the site-directed mutant.
